# Supplementary material for: Diagnostic roles of urinary kidney microvesicles in diabetic nephropathy
Source: PubMed Central journal article supplement — Ann Transl Med. 2020 Nov;8(21):1431. doi: 10.21037/atm-20-441 (PMC7723537; doi:10.21037/atm-20-441), 2020-11
Supplement: atm-08-21-1431-supplementary.pdf [file atm-08-21-1431-supplementary.pdf]

**Table S1** Urinary microvesicles of patients with diabetic nephropathy and proteinuric controls

|                                           | DN (n=49)             |                      | Proteinuric controls (MN/MCD, n=29) |                    | P      |
|-------------------------------------------|-----------------------|----------------------|-------------------------------------|--------------------|--------|
|                                           | DN alone (n=42)       | DN+MN (n=7)          | DM+MN/MCD (n=10)                    | MN/MCD (n=19)      |        |
| <b>Podocyte MVs</b>                       |                       |                      |                                     |                    |        |
| Nephrin <sup>+</sup>                      | 142.9 (47.2–834.7)    | 73.4 (9.7–325.7)     | 15.6 (9.1,72.9)*                    | 33.6 (19.6–52.5)*  | <0.001 |
| Podocin <sup>+</sup>                      | 226.9 (92.7–852.6)    | 97.8 (18.9–815.7)    | 54.8 (16.2–248.3)*                  | 75.3 (24.9–140.5)* | 0.001  |
| Nephrin <sup>+</sup> podocin <sup>+</sup> | 44.5 (8.9–383.0)      | 14.6 (2.7–68.0)      | 7.1 (3.4–40.0)*                     | 12.0 (1.9–19.5)*   | 0.001  |
| <b>Proximal tubular MVs</b>               |                       |                      |                                     |                    |        |
| AQP1 <sup>+</sup>                         | 230.3 (123.0–913.4)   | 395.8 (19.4–1,588.3) | 72.3 (36.8–238.4)                   | 105.9 (45.2–256.7) | 0.053  |
| Megalin <sup>+</sup>                      | 219.6 (78.5–650.8)    | 188.4 (53.1–671.7)   | 56.97 (35.7–107.9)*                 | 95.1 (16.3–227.0)  | 0.031  |
| AQP1 <sup>+</sup> megalin <sup>+</sup>    | 39.4 (5.0–148.3)      | 148.3 (8.2–366.1)    | 1.7 (0.8–9.3) <sup>†</sup>          | 10.9 (2.1–46.0)    | 0.017  |
| <b>Endothelial MVs</b>                    |                       |                      |                                     |                    |        |
| CD31 <sup>+</sup>                         | 52.4 (17.5–353.1)     | 45.24 (20.1–237.2)   | 18.1 (13.3–87.4)                    | 71.0 (13.2–108.2)  | 0.549  |
| CD144 <sup>+</sup>                        | 376.0 (134.8–2,782.4) | 366.6 (49.1–1,309.1) | 78.3 (8.6–332.8)*                   | 298.8 (71.4–927.1) | 0.028  |
| CD31 <sup>+</sup> CD144 <sup>+</sup>      | 33.4 (6.9–123.4)      | 10.3 (3.7–58.4)      | 11.6 (1.2–65.1)                     | 16.0 (4.1–59.0)    | 0.281  |

DN, diabetic nephropathy; DM, diabetic mellitus; MN, membranous nephropathy; MCD, minimal change disease; AQP1, Aquaporin 1; MVs, microvesicles. MVs levels are presented as median (interquartile range)  $10^3/\mu\text{mol}$  creatinine and analyzed using ANOVA followed by Student's *t* test with Bonferroni correction. P values listed in the table are ANOVA comparing four groups. \*P<0.05 compared to pure DN. <sup>†</sup>P<0.05 compared to DN+MN.

**Table S2** Combination of urinary nephrin+ MVs and diabetic retinopathy in relation to diabetic nephropathy

| Combination of urinary nephrin <sup>+</sup> MV and DR | Diabetic nephropathy |          | Total |
|-------------------------------------------------------|----------------------|----------|-------|
|                                                       | Positive             | Negative |       |
| Positive                                              | 40                   | 3        | 43    |
| Negative                                              | 5                    | 26       | 31    |
| Total                                                 | 45                   | 29       |       |

MVs, microvesicles; DR, diabetic retinopathy.

**Table S3** Comparisons of clinical-pathological characteristics among diabetic nephropathy patients of different classification

|                                        | DN-I (n=4)       | DN-II (n=12)       | DN-III (n=29)             | DN-IV (n=4)                        | P value |
|----------------------------------------|------------------|--------------------|---------------------------|------------------------------------|---------|
| Gender male, n (%)                     | 2 (50.0)         | 10 (83.3)          | 23 (79.3)                 | 3 (75.0)                           | 0.564   |
| Age, years                             | 54.3±12.7        | 51.7±9.9           | 44.6±11.0                 | 44.0±10.4                          | 0.138   |
| Urine protein, g/24 h                  | 6.2±2.8          | 4.3±3.9            | 6.7±4.1                   | 7.4±3.2                            | 0.299   |
| Serum creatinine, µmol/L               | 81.4 (70.4–90.5) | 109.1 (87.1–151.7) | 128.2 (95.9–283.3)*       | 477.2 (265.5–689.0)* <sup>††</sup> | 0.001   |
| Pathological features                  |                  |                    |                           |                                    |         |
| Glomerular lesions                     |                  |                    |                           |                                    |         |
| Glomerular sclerosis                   | 0 (0–0)          | 8.0 (0–15.6)       | 6.7 (0–21.5)              | 55.6 (38.1–60.5)* <sup>††</sup>    | 0.001   |
| Ischemic sclerosis                     | 1.6 (0–5.0)      | 17.7 (10.1–30.4)*  | 4.8 (0–14.2) <sup>†</sup> | 15.5 (7.7–30.6)                    | <0.001  |
| Mesangial expansion                    | 1 (0.25–1)       | 2 (2–2.75)*        | 3 (3–3)* <sup>†</sup>     | 3 (2.25–3)*                        | <0.001  |
| Microaneuysms or mesangiolyysis, n (%) | 1 (25.0)         | 3 (25.0)           | 23 (29.0)* <sup>†</sup>   | 3 (75.0)* <sup>†</sup>             | 0.004   |
| Kimmelstiel–Wilson lesion, n (%)       | 0                | 0                  | 29 (100.0)* <sup>†</sup>  | 3 (75.0)* <sup>†</sup>             | <0.001  |
| Tubulointerstitial lesions             |                  |                    |                           |                                    |         |
| Tubular injury score                   | 2 (2–3)          | 2 (2–2)            | 2 (2–3)                   | 2.5 (2–4)                          | 0.657   |
| Chronic tubulointerstitial score       | 2 (2–2)          | 2.5 (2–4)          | 4 (2–5)*                  | 6 (6–8)* <sup>††</sup>             | 0.024   |
| Interstitial inflammation score        | 1 (1–2)          | 1 (1–2)            | 2 (1–2)                   | 3 (3–4)* <sup>††</sup>             | 0.010   |
| Vascular score                         | 1 (1–2)          | 2 (2–3)*           | 3 (2–3)*                  | 3 (3–3)*                           | 0.023   |

Normal range: serum creatinine, 44–133 mmol/L; urine protein, 0–0.15 g/24 h. Data are presented as n (%), mean ± SD or median (interquartile range) and analyzed using Student's *t* test, or Mann-Whitney rank sum test or a chi-square test wherever applicable without correction. P values listed in the table are ANOVA comparing the four groups. \*P<0.05 compared to DN I; <sup>†</sup>P<0.05 compared to DN II; <sup>††</sup>P<0.05 compared to DN III. DN, diabetic nephropathy.

**Table S4** Correlations between urinary microvesicles and pathological features in diabetic nephropathy

|                                           | Glomerular sclerosis |       | Ischemic sclerosis |       | Mesangial expansion |       | Tubular injury score |        | Chronic tubulointerstitial score |       | Interstitial inflammation score |       | Vascular score |        |
|-------------------------------------------|----------------------|-------|--------------------|-------|---------------------|-------|----------------------|--------|----------------------------------|-------|---------------------------------|-------|----------------|--------|
|                                           | r                    | P     | r                  | P     | r                   | P     | r                    | P      | r                                | P     | r                               | P     | r              | P      |
| Podocyte MVs                              |                      |       |                    |       |                     |       |                      |        |                                  |       |                                 |       |                |        |
| nephrin <sup>+</sup>                      | 0.151                | 0.300 | 0.109              | 0.462 | 0.278               | 0.053 | 0.098                | 0.501  | -0.059                           | 0.687 | -0.109                          | 0.456 | 0.217          | 0.135  |
| podocin <sup>+</sup>                      | 0.036                | 0.808 | 0.118              | 0.430 | 0.209               | 0.153 | 0.203                | 0.165  | -0.141                           | 0.340 | -0.202                          | 0.169 | 0.225          | 0.124  |
| nephrin <sup>+</sup> podocin <sup>+</sup> | 0.122                | 0.404 | 0.088              | 0.554 | 0.270               | 0.061 | 0.067                | 0.646  | -0.075                           | 0.609 | -0.132                          | 0.365 | 0.166          | 0.254  |
| Proximal tubular MVs                      |                      |       |                    |       |                     |       |                      |        |                                  |       |                                 |       |                |        |
| AQP1 <sup>+</sup>                         | -0.058               | 0.694 | 0.161              | 0.276 | 0.277               | 0.054 | 0.458                | <0.001 | -0.070                           | 0.635 | -0.140                          | 0.337 | 0.251          | 0.082  |
| megalyn <sup>+</sup>                      | 0.088                | 0.549 | 0.065              | 0.659 | 0.404               | 0.004 | 0.352                | 0.013  | -0.031                           | 0.834 | -0.096                          | 0.512 | 0.442          | <0.001 |
| AQP1+ megalyn <sup>+</sup>                | -0.134               | 0.360 | -0.020             | 0.893 | 0.354               | 0.013 | 0.349                | 0.014  | -0.008                           | 0.959 | 0.033                           | 0.821 | 0.325          | 0.023  |
| Endothelial MVs                           |                      |       |                    |       |                     |       |                      |        |                                  |       |                                 |       |                |        |
| CD31 <sup>+</sup>                         | 0.065                | 0.669 | -0.063             | 0.679 | 0.306               | 0.039 | 0.503                | <0.001 | 0.100                            | 0.507 | 0.022                           | 0.884 | 0.349          | 0.017  |
| CD144 <sup>+</sup>                        | 0.072                | 0.635 | 0.020              | 0.899 | 0.385               | 0.008 | 0.446                | 0.002  | 0.110                            | 0.466 | -0.005                          | 0.975 | 0.473          | <0.001 |
| CD31 <sup>+</sup> CD144 <sup>+</sup>      | 0.121                | 0.421 | 0.046              | 0.763 | 0.388               | 0.008 | 0.481                | <0.001 | 0.138                            | 0.361 | 0.039                           | 0.797 | 0.391          | 0.007  |

DN, diabetic nephropathy; AQP1, Aquaporin 1; MVs, microvesicles.

**Table S5** Ordinal regression models of microvesicles for pathological features in diabetic nephropathy

|                                             | Univariant |          |       | Multivariant Stepwise |          |       |
|---------------------------------------------|------------|----------|-------|-----------------------|----------|-------|
|                                             | OR         | 95% CI   | P     | OR                    | 95% CI   | P     |
| Mesangial expansion                         |            |          |       |                       |          |       |
| Proximal tubular MVs                        |            |          |       |                       |          |       |
| Ig(megalin <sup>+</sup> )                   | 3.5        | 1.3–9.4  | 0.015 | 2.0                   | 0.7–6.3  | 0.219 |
| Ig(AQP1 <sup>+</sup> megalin <sup>+</sup> ) | 2.5        | 1.2–5.5  | 0.021 |                       |          |       |
| Endothelial MVs                             |            |          |       |                       |          |       |
| Ig(CD31 <sup>+</sup> )                      | 2.4        | 1.0–5.9  | 0.064 |                       |          |       |
| Ig(CD144 <sup>+</sup> )                     | 2.6        | 1.1–6.2  | 0.025 |                       |          |       |
| Ig(CD31 <sup>+</sup> CD144 <sup>+</sup> )   | 2.8        | 1.2–7.0  | 0.024 | 2.2                   | 0.8–6.0  | 0.140 |
| Tubular injury score                        |            |          |       |                       |          |       |
| Proximal tubular MVs                        |            |          |       |                       |          |       |
| Ig(AQP1 <sup>+</sup> )                      | 5.2        | 1.8–15.6 | 0.003 | 2.9                   | 0.9–9.7  | 0.078 |
| Ig(megalin <sup>+</sup> )                   | 3.0        | 1.1–8.0  | 0.027 |                       |          |       |
| Ig(AQP1 <sup>+</sup> megalin <sup>+</sup> ) | 2.6        | 1.2–5.8  | 0.018 |                       |          |       |
| Endothelial MVs                             |            |          |       |                       |          |       |
| Ig(CD31 <sup>+</sup> )                      | 5.4        | 2.0–15.0 | 0.001 | 3.9                   | 1.3–11.3 | 0.013 |
| Ig(CD144 <sup>+</sup> )                     | 3.5        | 1.5–8.0  | 0.003 |                       |          |       |
| Ig(CD31 <sup>+</sup> CD144 <sup>+</sup> )   | 3.5        | 1.5–8.3  | 0.005 |                       |          |       |
| Vascular score                              |            |          |       |                       |          |       |
| Endothelial MVs                             |            |          |       |                       |          |       |
| Ig(CD31 <sup>+</sup> )                      | 2.5        | 1.1–5.7  | 0.035 |                       |          |       |
| Ig(CD144 <sup>+</sup> )                     | 3.4        | 1.5–7.8  | 0.003 | 3.1                   | 1.2–8.4  | 0.025 |
| Ig(CD31 <sup>+</sup> CD144 <sup>+</sup> )   | 2.6        | 1.2–5.6  | 0.020 |                       |          |       |
| Proximal tubular MVs                        |            |          |       |                       |          |       |
| Ig(megalin <sup>+</sup> )                   | 3.5        | 1.4–8.8  | 0.007 | 1.3                   | 0.4–4.4  | 0.712 |
| Ig(AQP1 <sup>+</sup> megalin <sup>+</sup> ) | 2.2        | 1.1–4.4  | 0.024 |                       |          |       |

AQP1, aquaporin 1; MVs, microvesicles; Ig, log<sub>10</sub>; CI, confidence interval; OR, odds ratio.

**Table S6** Correlations between urinary microvesicles and three potential insults contributing to tubular injury

|                                           | Proteinuric controls |       |                                 |       |                |       | DN            |       |                                 |       |                |       |
|-------------------------------------------|----------------------|-------|---------------------------------|-------|----------------|-------|---------------|-------|---------------------------------|-------|----------------|-------|
|                                           | Urine protein        |       | Interstitial inflammation score |       | vascular score |       | Urine protein |       | Interstitial inflammation score |       | Vascular score |       |
|                                           | r                    | P     | r                               | P     | r              | P     | r             | P     | r                               | P     | r              | P     |
| Proximal tubular MVs                      |                      |       |                                 |       |                |       |               |       |                                 |       |                |       |
| AQP1 <sup>+</sup>                         | 0.505                | 0.005 | 0.337                           | 0.074 | 0.191          | 0.320 | 0.050         | 0.731 | -0.067                          | 0.649 | 0.251          | 0.082 |
| megalin <sup>+</sup>                      | 0.383                | 0.040 | 0.398                           | 0.033 | 0.515          | 0.004 | 0.167         | 0.252 | -0.119                          | 0.415 | 0.442          | 0.001 |
| AQP1 <sup>+</sup> megalin <sup>+</sup>    | 0.497                | 0.006 | 0.523                           | 0.004 | 0.389          | 0.037 | 0.084         | 0.567 | 0.042                           | 0.776 | 0.325          | 0.023 |
| Podocyte MVs                              |                      |       |                                 |       |                |       |               |       |                                 |       |                |       |
| Nephrin <sup>+</sup>                      | 0.201                | 0.296 | 0.424                           | 0.022 | 0.246          | 0.198 | 0.067         | 0.650 | -0.068                          | 0.643 | 0.217          | 0.135 |
| Podocin <sup>+</sup>                      | 0.197                | 0.307 | 0.155                           | 0.421 | 0.035          | 0.857 | 0.029         | 0.844 | -0.146                          | 0.323 | 0.225          | 0.124 |
| Nephrin <sup>+</sup> podocin <sup>+</sup> | -0.018               | 0.927 | 0.212                           | 0.269 | 0.187          | 0.331 | 0.011         | 0.940 | -0.074                          | 0.613 | 0.166          | 0.254 |
| Endothelial cell MVs                      |                      |       |                                 |       |                |       |               |       |                                 |       |                |       |
| CD31 <sup>+</sup>                         | 0.278                | 0.235 | 0.496                           | 0.026 | 0.444          | 0.050 | 0.191         | 0.204 | 0.076                           | 0.616 | 0.349          | 0.017 |
| CD144 <sup>+</sup>                        | 0.338                | 0.145 | 0.407                           | 0.075 | 0.350          | 0.131 | 0.156         | 0.301 | 0.049                           | 0.747 | 0.473          | 0.001 |
| CD31 <sup>+</sup> CD144 <sup>+</sup>      | 0.227                | 0.336 | 0.478                           | 0.033 | 0.494          | 0.027 | 0.095         | 0.531 | 0.102                           | 0.502 | 0.391          | 0.007 |

DN, diabetic nephropathy; AQP1, Aquaporin 1; MVs, microvesicles.

**Table S7** Vascular score between diabetic nephropathy and proteinuric controls with low proteinuria and interstitial inflammation

|                                    | Vascular score |
|------------------------------------|----------------|
| Urine protein ≤4 g                 |                |
| Proteinuric controls (n=12)        | 1 (0.25–2)     |
| DN (n=20)                          | 2 (1–3)        |
| P                                  | 0.024          |
| Interstitial inflammation score =1 |                |
| Proteinuric controls (n=18)        | 1 (1–1.3)      |
| DN (n=23)                          | 2 (1–3)        |
| P                                  | 0.002          |

DN, diabetic nephropathy.
